# Supplementary material for: Maghemite-human serum albumin hybrid nanoparticles: towards a theranostic system with high MRI r2* relaxivity
Source: Royal Society of Chemistry journal article supplement (doi:10.1039/c6tb00778c), 2016-01-01
Supplement: c6tb00778c1.pdf [file c6tb00778c1.pdf]

## Maghemite-Human Serum Albumin Hybrid Nanoparticles: Towards a Theranostic System with High MRI $r_2^*$ Relaxivity

Rivka Ben Ishay, Liron L Israel, Esthy Levy Eitan, David M Partouche, Jean-Paul Lellouche\*

Department of Chemistry, Nanomaterials Research Center, Institute of Nanotechnology & Advanced Materials, Bar-Ilan University, Ramat-Gan 5290002, Israel.

\*Corresponding Author: [jean-paul.m.lellouche@biu.ac.il](mailto:jean-paul.m.lellouche@biu.ac.il); Tel: 972-3-5318324; Fax: 972-3-7384053

### Supporting Information

#### DoE-Optimized Fabrication of HSA Core NPs – Complementary Graphs & Data relating to the Fabrication of Optimized HSA Core NPs

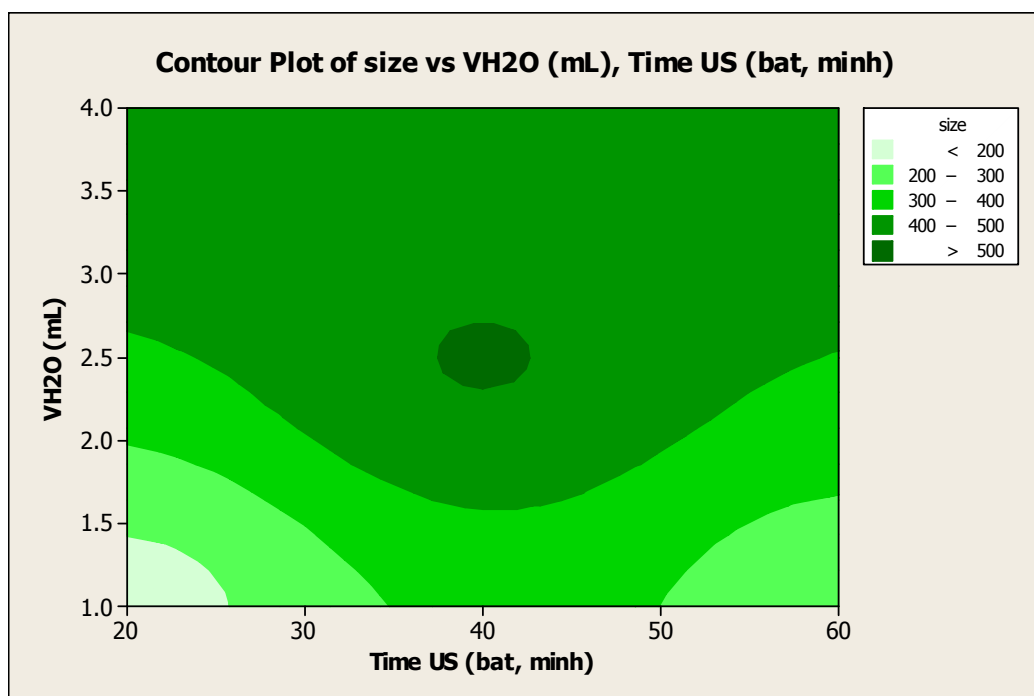

**Figure SI-1.** DoE-optimized fabrication of HSA<sub>DoE</sub> NPS – 2D contour plot of size vs. both relative volume of H<sub>2</sub>O (mL) and the time of ultrasonication (minutes)

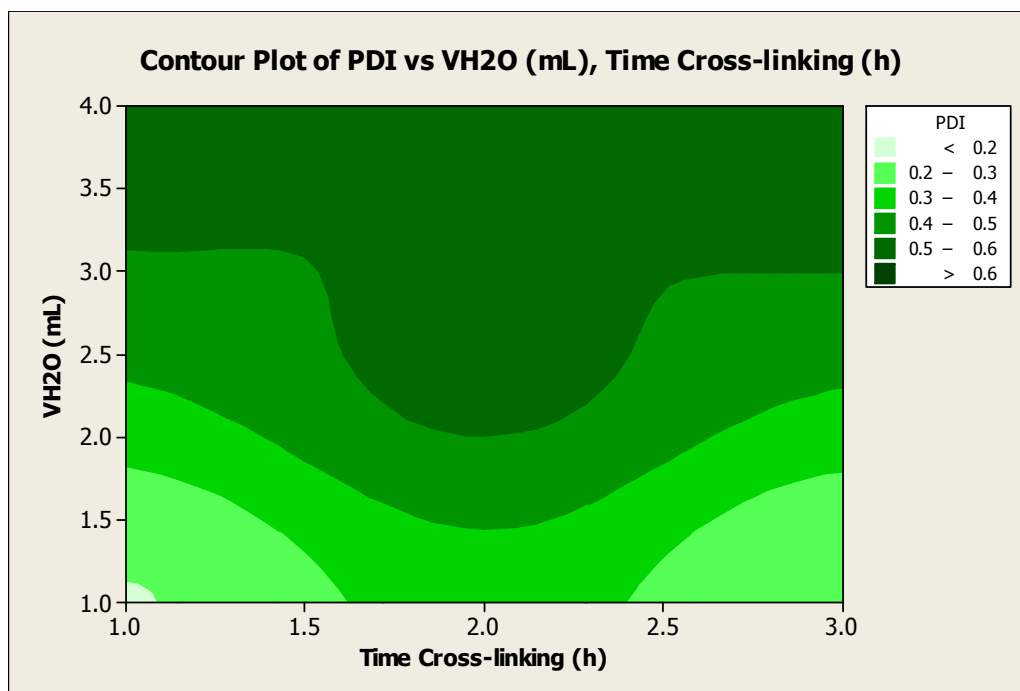

**Figure SI-2.** DoE-optimized fabrication of HSA<sub>DoE</sub> NPS – 2D contour plot of PDI vs. both relative volume of H<sub>2</sub>O (mL) and the time of cross-linking (hours)

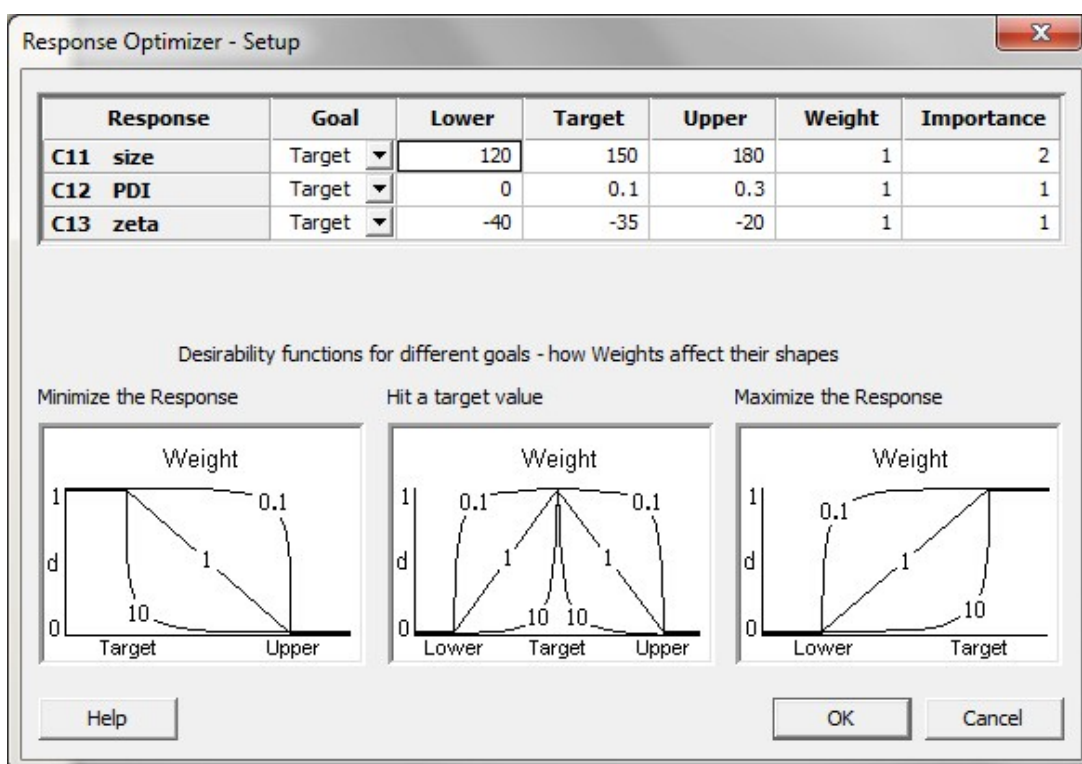

**Figure SI-3.** DoE-optimized fabrication of HSA<sub>DoE</sub> NPS – NP specifications for MINITAB® 16 software profile optimizer tool calculations

## DoE-Optimized HSA<sub>DoE</sub> NPS – Additional Characterization Data

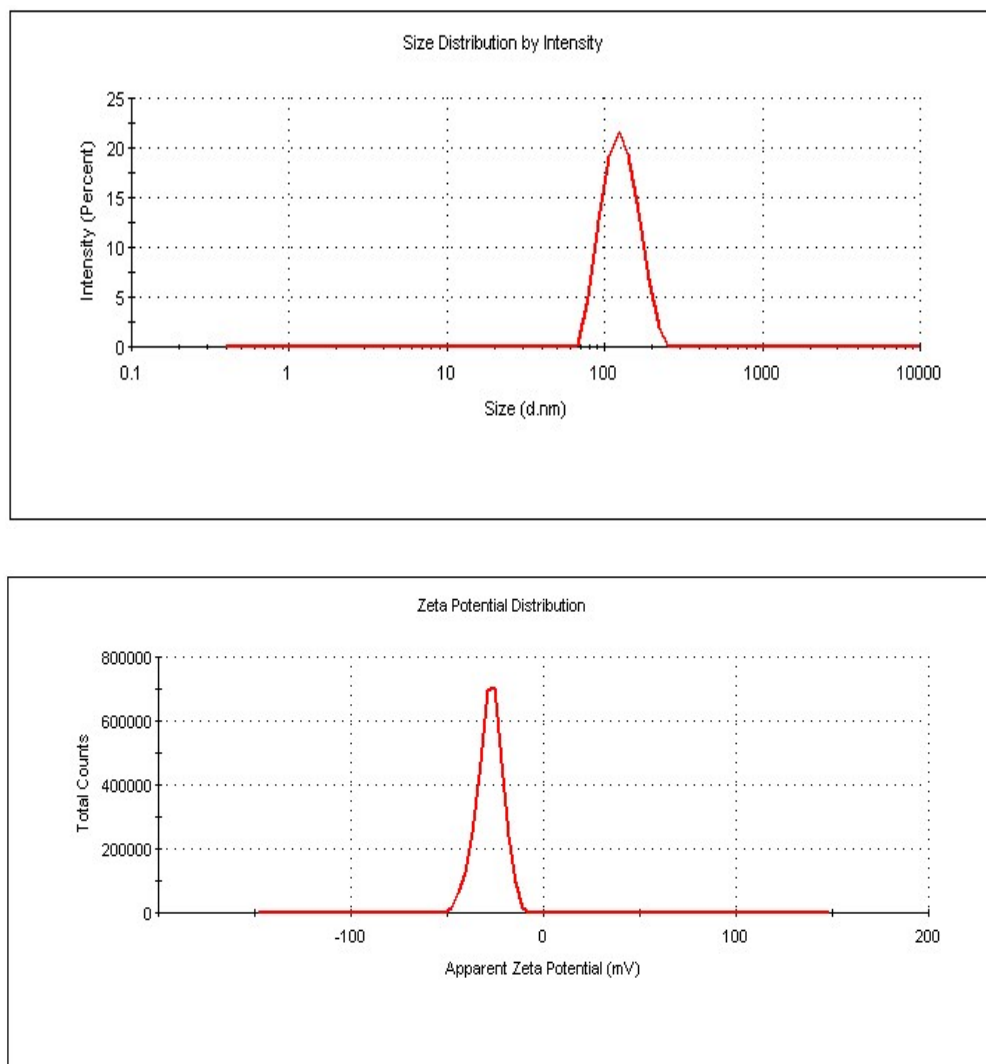

**Figure SI-4.** DLS Analysis of DoE-optimized (i)  $149.56 \pm 1.8$  nm – sized (*top*) and  $-35.4 \pm 2.4$  mV-charged (*bottom*) HSA<sub>DoE</sub> NPS (MINITAB® 16 software profile optimizer tool output)

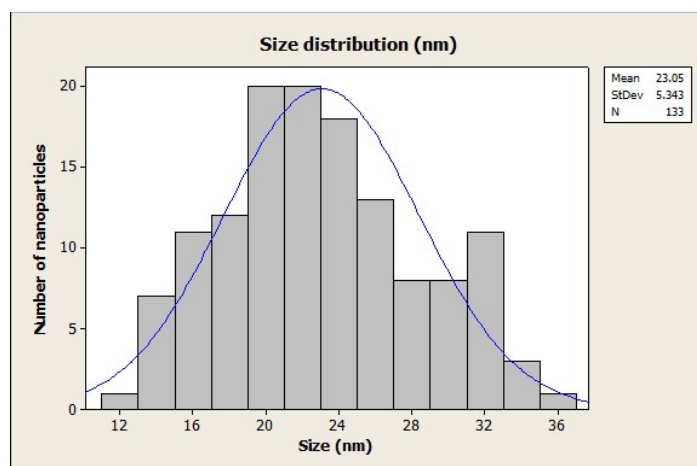

**Figure SI-5.** Size distribution histogram of small  $23.05 \pm 5.3$  nm-sized core  $\text{HSA}_{\text{D}_{0\text{E}}}$  NPs (MINITAB® 16 software profile optimizer tool output, TEM microphotograph analysis)

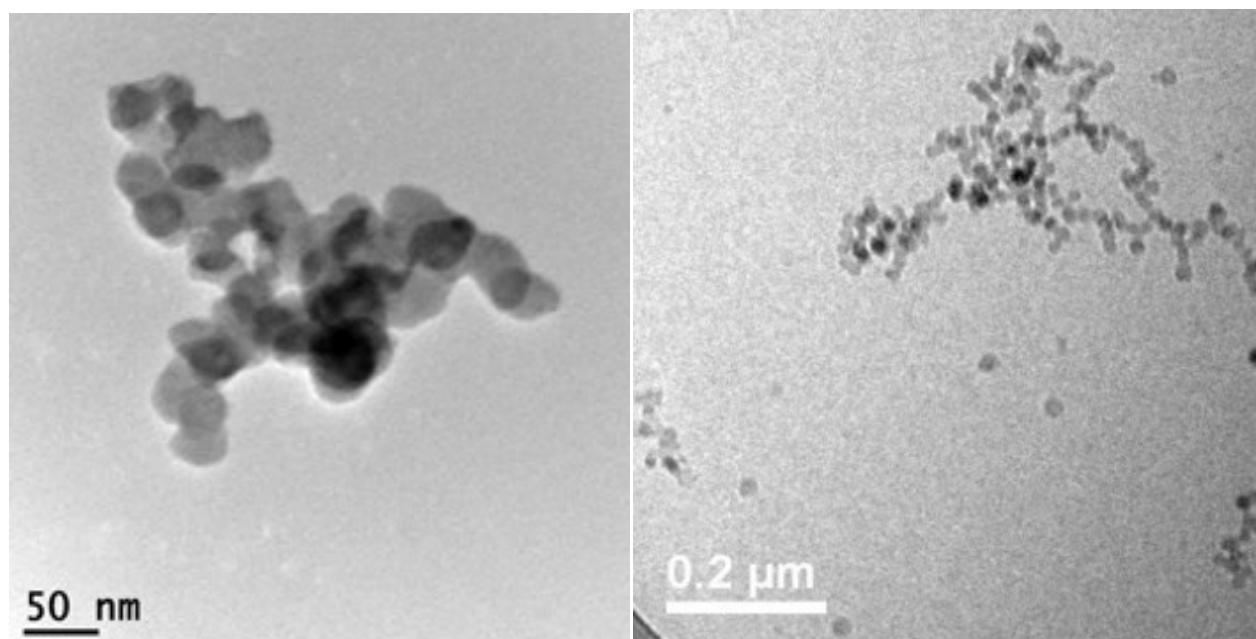

**Figure SI-6.** TEM images of core  $\text{HSA}_{\text{D}_{0\text{E}}}$  NPs: TEM (*left*, scale bar: 50 nm) and cryo-TEM (*right*, scale bar: 0.2  $\mu\text{m}$ ) microphotographs of  $23.05 \pm 5.3$  nm-sized core  $\text{HSA}_{\text{D}_{0\text{E}}}$  NPs

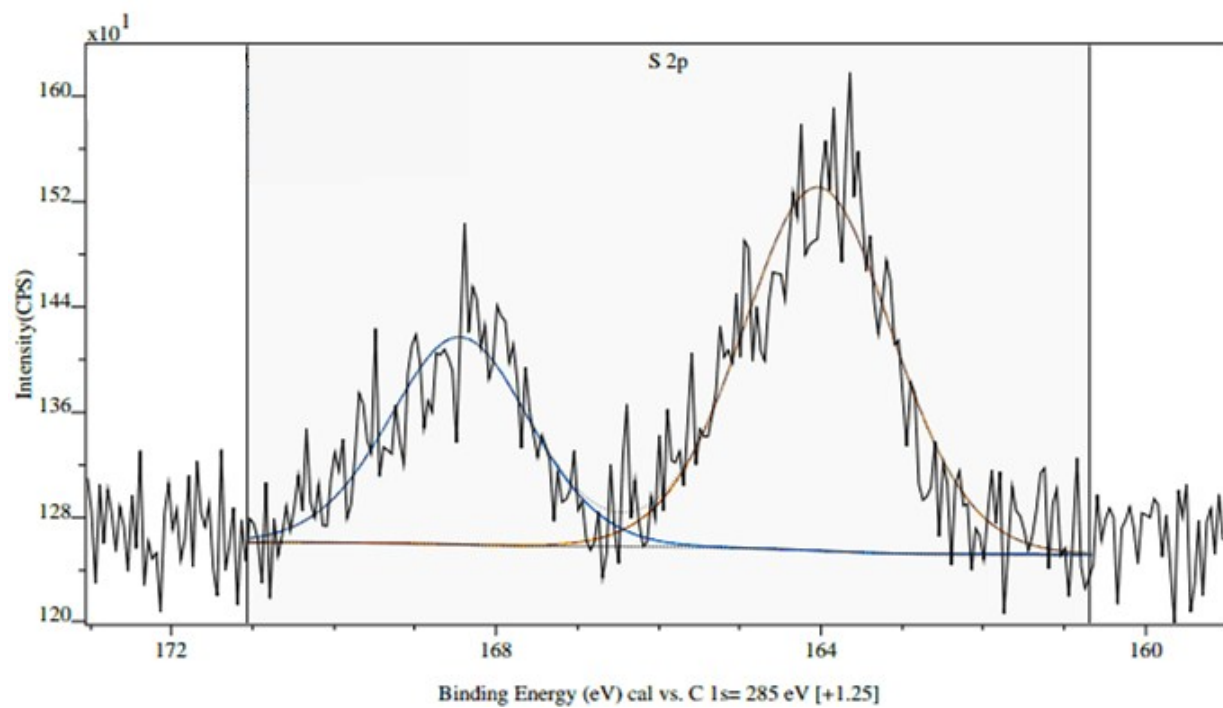

**Figure SI-7:** Core HSA<sub>D0E</sub> NPs - XPS Spectrum (NPs fabrication using a 10% DVS EtOH solution)
